# Supplementary material
Source: PubMed Central journal article supplement (PMC1891239)

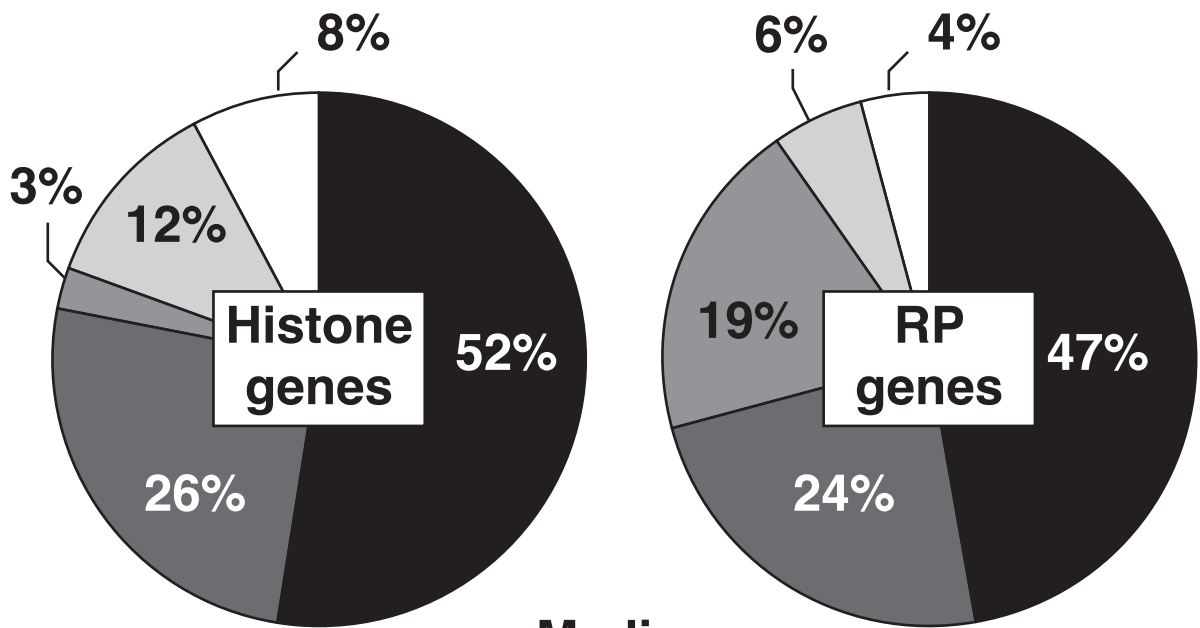

| Median fold enrichment |             |    |
|------------------------|-------------|----|
| N                      |             | N  |
| 41                     | ■ > 2.0     | 34 |
| 20                     | ■ 2.0 - 1.4 | 17 |
| 2                      | ■ 1.4 - 1.2 | 14 |
| 9                      | ■ 1.2 - 1.0 | 4  |
| 6                      | □ < 1.0     | 3  |

Supplement: pnas_0703490104_5.pdf [file pnas_0703490104_5.pdf]
